# Supplementary material for: Interventions to Attenuate Cardiovascular Calcification Progression: A Systematic Review of Randomized Clinical Trials
Source: PubMed Central journal article supplement — J Am Heart Assoc. 2023 Nov 28;12(23):e031676. doi: 10.1161/JAHA.123.031676 (PMC10727339; doi:10.1161/jaha.123.031676), 2023-11-28
Supplement: JAH3-12-e031676-s001.pdf [file JAH3-12-e031676-s001.pdf]

# **Supplemental Material**

## **Data S1. Search Strategy.**

Ovid MEDLINE(R) <1946 to November 7, 2022> and Embase Classic + Embase <1947 to November 7, 2022)

1. vascular calcification or arter\* calcification or aortic calcification or coronary calcification or coronary artery calci\* or valv\* calcification or CAC.mp
2. exp vascular calcification/
3. 1 or 2
4. Limit 3 to (clinical trial or randomised controlled trial or controlled clinical trial)
5. (random\* control\* trial\* or clinical trial\* or control\* clinical trial\* or rct).mp
6. 3 and 5
7. 4 or 6
8. Remove duplicates from 7

Ovid MEDLINE(R) <1946 to October 8, 2023> and Embase Classic + Embase <1947 to October 8, 2023)

1. dense calci\* or calci\* plaque
2. limit 1 to (clinical trial or randomised controlled trial or controlled clinical trial)

**Table S1. Risk of bias assessment for included RCTs.**

| Author and Year             | Random sequence generation | Allocation concealment | Blinding                                  |                               | Incomplete outcome data assessed (attrition)           | Lack of selective outcome reporting | Lack of other sources of bias               | Overall evaluation                                  |
|-----------------------------|----------------------------|------------------------|-------------------------------------------|-------------------------------|--------------------------------------------------------|-------------------------------------|---------------------------------------------|-----------------------------------------------------|
|                             |                            |                        | Participants, investigators (performance) | Outcome assessors (detection) |                                                        |                                     |                                             |                                                     |
| Arad 2005 <sup>11</sup>     | Yes                        | Not described          | Yes                                       | Yes                           | Intention to treat analysis (with 18.4% total dropout) | Yes                                 | Yes, but industry provided study medication | Moderate RoB due to attrition bias                  |
| Cowell 2005 <sup>12</sup>   | Yes                        | Yes                    | Yes                                       | Yes                           | Uneven loss of follow up (9% treatment, 5% placebo)    | Yes                                 | Yes, but industry provided study medication | Moderate RoB due to attrition bias                  |
| Dichtl 2008 <sup>13</sup>   | Yes                        | Not described          | Not described                             | Not described                 | Even loss of follow up                                 | Yes                                 | Yes, but industry provided study medication | High RoB in the absence of reporting across domains |
| Egede 2013 <sup>50</sup>    | Yes                        | Not described          | Yes                                       | Yes                           | Even loss of follow up                                 | Yes                                 | Yes                                         | Low RoB                                             |
| Hougaard 2020 <sup>53</sup> | Yes                        | Not described          | Yes                                       | Yes                           | Even loss of follow up                                 | Yes                                 | Yes                                         | Low RoB                                             |
| Lee 2016 <sup>52</sup>      | Yes                        | Not described          | No                                        | No                            | Probably no loss of follow up                          | Yes                                 | Probably no – industry provided funding     | High RoB due to performance and detection bias      |
| Lo 2015 <sup>51</sup>       | Yes                        | Not described          | Yes                                       | Yes                           | Uneven loss of follow up (11% treatment, 5% placebo)   | Yes                                 | Probably no – industry provided funding     | High RoB due to attrition and industry involvement  |
| Houslay 2006 <sup>14</sup>  | Yes                        | Yes                    | Yes                                       | Yes                           | Uneven loss of follow up (18% treatment, 15% placebo)  | Yes                                 | Yes, but industry provided study medication | Low RoB                                             |

|                                      |     |              |              |     |                                                                                         |     |                                                              |                                                      |
|--------------------------------------|-----|--------------|--------------|-----|-----------------------------------------------------------------------------------------|-----|--------------------------------------------------------------|------------------------------------------------------|
| <b>Longenecker 2016<sup>15</sup></b> | Yes | Not reported | Yes          | Yes | Uneven loss of follow up (7% treatment, 13% placebo)                                    | Yes | Probably no – industry provided study medication and sponsor | High RoB due to attrition and industry involvement   |
| <b>Miyoshi 2018<sup>16</sup></b>     | Yes | Not reported | Not reported | Yes | Uneven loss of follow up (5% vs 10% vs 6%)                                              | Yes | Yes                                                          | Moderate RoB due to lack of reporting across domains |
| <b>Park 2016<sup>49</sup></b>        | Yes | Not reported | Yes          | Yes | Not described (28% total dropout)                                                       | Yes | Yes                                                          | Moderate RoB due to probable attrition bias          |
| <b>Petri 2011<sup>17</sup></b>       | Yes | Not reported | Yes          | Yes | Uneven loss of follow up (1% treatment, 4.5% placebo)                                   | Yes | Yes, but industry sponsored                                  | Low RoB                                              |
| <b>Plazak 2011<sup>18</sup></b>      | Yes | Not reported | Yes          | Yes | Probably no loss of follow up                                                           | Yes | Yes                                                          | Low RoB                                              |
| <b>Raggi 2005<sup>19</sup></b>       | Yes | Probably yes | Yes          | Yes | Intention-to-treat analysis with uneven loss of follow up (14% treatment vs 8% control) | Yes | Probably no – industry provided study medication and sponsor | Moderate RoB (industry involvement and attrition)    |
| <b>Schmermund 2006<sup>20</sup></b>  | Yes | Probably yes | Yes          | Yes | Uneven loss to follow up (20% treatment, 14% comparator)                                | Yes | Yes, but industry sponsor                                    | Moderate RoB (industry involvement and attrition)    |
| <b>Terry 2007<sup>21</sup></b>       | Yes | Yes          | Yes          | Yes | Even loss of follow up                                                                  | Yes | Yes, but industry sponsor                                    | Low RoB                                              |
| <b>Budoff 2009<sup>22</sup></b>      | Yes | Probably yes | Yes          | Yes | Even loss of follow up                                                                  | Yes | Probably no - industry provided                              | Moderate RoB due to industry involvement             |

|                                    |              |              |     |     |                                                       |     |                                                                      |                                                                                               |
|------------------------------------|--------------|--------------|-----|-----|-------------------------------------------------------|-----|----------------------------------------------------------------------|-----------------------------------------------------------------------------------------------|
|                                    |              |              |     |     |                                                       |     | study medication and sponsor                                         |                                                                                               |
| <b>Budoff 2004<sup>23</sup></b>    | Yes          | Yes          | Yes | Yes | Even loss of follow up                                | Yes | Probably no – industry provided study medication and sponsor         | Low RoB                                                                                       |
| <b>Matsumoto 2014<sup>24</sup></b> | Probably yes | Not reported | Yes | Yes | Even loss of follow up                                | Yes | Yes, but some industry sponsorship and provision of study medication | Moderate RoB due to industry involvement and lack of comprehensive description across domains |
| <b>Shaikh 2020<sup>25</sup></b>    | Yes          | Not reported | Yes | Yes | Not described (17.5% total dropout)                   | Yes | Yes                                                                  | Moderate RoB due to absence of reporting across domains                                       |
| <b>Wlosinska 2020<sup>27</sup></b> | Yes          | Yes          | Yes | Yes | Even loss of follow up                                | Yes | Probably no – industry provided study medication and sponsor         | Low RoB                                                                                       |
| <b>Zeb 2012<sup>26</sup></b>       | Yes          | Yes          | Yes | Yes | Uneven loss of follow up (27% treatment, 19% placebo) | Yes | Probably no – industry provided study medication and sponsor         | Moderate RoB due to attrition and industry involvement                                        |
| <b>Basaria 2015<sup>28</sup></b>   | Yes          | Yes          | Yes | Yes | Even loss of follow up                                | Yes | Probably no – industry sponsored                                     | Low RoB                                                                                       |
| <b>Budoff 2017<sup>29</sup></b>    | Probably yes | Probably yes | Yes | Yes | Even loss of follow up                                | Yes | Probably no – industry involvement                                   | Moderate RoB                                                                                  |
| <b>Harman 2014<sup>30</sup></b>    | Yes          | No           | Yes | Yes | Even loss of follow up                                | Yes | Probably no                                                          | Low RoB                                                                                       |

|                                       |              |              |                         |             |                                                        |     |                                  |                                                                   |
|---------------------------------------|--------------|--------------|-------------------------|-------------|--------------------------------------------------------|-----|----------------------------------|-------------------------------------------------------------------|
| <b>Bellinge 2021<sup>31</sup></b>     | Yes          | Yes          | Yes                     | Yes         | Uneven loss of follow up (5% vs 5% vs 3% vs 0%)        | Yes | Yes                              | Low RoB                                                           |
| <b>Brandenburg 2017<sup>32</sup></b>  | Probably yes | Not reported | Not reported            | Yes         | Uneven loss of follow up (32% treatment, 44% placebo)  | Yes | Probably no – industry sponsored | High RoB due to attrition and absence of reporting across domains |
| <b>Diederichsen 2022<sup>54</sup></b> | Yes          | Yes          | Yes                     | Yes         | Uneven loss of follow up (6% treatment vs 11% placebo) | Yes | Probably yes                     | Moderate RoB                                                      |
| <b>Shea 2009<sup>33</sup></b>         | Yes          | Not reported | Yes                     | Yes         | Even loss of follow up                                 | Yes | Probably yes                     | Low RoB                                                           |
| <b>Zwakenberg 2019<sup>34</sup></b>   | Yes          | Not reported | Yes                     | Yes         | Uneven loss of follow up (6% treatment, 18% placebo)   | Yes | Probably yes                     | Moderate RoB due to attrition                                     |
| <b>Henzel 2021<sup>58</sup></b>       | Yes          | Not reported | No                      | Yes         | Even loss of follow up                                 | Yes | Probably yes                     | Moderate RoB due to performance bias                              |
| <b>Fitch 2012<sup>59</sup></b>        | Yes          | Yes          | No in the lifestyle arm | Yes         | Uneven loss of follow up                               | Yes | Probably yes                     | Moderate RoB due to attrition and performance bias                |
| <b>Kuller 2011<sup>35</sup></b>       | Yes          | No           | No                      | Probably no | Uneven loss of follow up (13% treatment, 8% control)   | Yes | Probably yes                     | High RoB due to performance, detection and attrition bias         |
| <b>Lehmann 2011<sup>36</sup></b>      | Yes          | Not reported | No                      | Yes         | Even loss of follow up                                 | Yes | Yes                              | Moderate RoB due to performance bias                              |
| <b>Lee 2017<sup>37</sup></b>          | Yes          | Not reported | Not reported            | Yes         | Uneven loss of follow up (5%                           | Yes | Yes                              | Moderate RoB due to insufficient                                  |

|                                     |     |              |     |     |                                                                         |     |                           |                                                                          |
|-------------------------------------|-----|--------------|-----|-----|-------------------------------------------------------------------------|-----|---------------------------|--------------------------------------------------------------------------|
|                                     |     |              |     |     | treatment, 10% control)                                                 |     |                           | reporting across domains, and attrition                                  |
| <b>Lee 2019<sup>38</sup></b>        | Yes | Not reported | No  | Yes | Uneven loss of follow up (10% treatment, 6% control)                    | Yes | Yes                       | Moderate RoB due to performance and attrition bias                       |
| <b>Lee 2018<sup>39</sup></b>        | Yes | Probably no  | No  | No  | Uneven loss of follow up (7% treatment, 15% control)                    | Yes | Probably yes              | Moderate RoB due to performance and attrition bias                       |
| <b>Win 2019<sup>40</sup></b>        | Yes | Not reported | No  | Yes | Uneven loss of follow up (21% treatment, 9% control)                    | Yes | Yes but industry sponsor  | High RoB due to performance and attrition bias, and industry involvement |
| <b>Kranenburg 2018<sup>41</sup></b> | Yes | Not reported | Yes | Yes | Even loss of follow up                                                  | Yes | Probably yes              | Low RoB                                                                  |
| <b>Pawade 2021<sup>42</sup></b>     | Yes | Yes          | Yes | Yes | Uneven loss of follow up (14% treatment 1, 10% treatment 2, 8% placebo) | Yes | Probably yes              | Moderate RoB due to attrition                                            |
| <b>Motro 2000<sup>43</sup></b>      | Yes | Not reported | Yes | Yes | Even loss of follow up (intention to treat)                             | Yes | Yes but industry sponsor  | Low RoB                                                                  |
| <b>Motro 2007<sup>44</sup></b>      | Yes | Not reported | Yes | Yes | Even loss of follow up                                                  | Yes | Yes, but industry sponsor | Low RoB                                                                  |
| <b>Alfaddagh 2017<sup>56</sup></b>  | Yes | Probably yes | No  | Yes | Uneven loss of follow up (15% treatment vs 32%                          | Yes | Probably yes              | Moderate RoB due to attrition bias                                       |

|                                       |     |              |     |     |                                                                                                 |     |                                                                   |                                                                         |
|---------------------------------------|-----|--------------|-----|-----|-------------------------------------------------------------------------------------------------|-----|-------------------------------------------------------------------|-------------------------------------------------------------------------|
|                                       |     |              |     |     | placebo);<br>intention-to-<br>treat                                                             |     |                                                                   |                                                                         |
| <b>Budoff 2020<sup>55</sup></b>       | Yes | Not reported | Yes | Yes | Uneven loss<br>of follow<br>(23%<br>treatment vs<br>7.5%<br>placebo);<br>intention-to-<br>treat | Yes | Probably no<br>– industry<br>involvement<br>and sponsor           | High RoB due<br>to attrition bias<br>and industry<br>involvement        |
| <b>Davidson<br/>2010<sup>45</sup></b> | Yes | Not reported | Yes | Yes | Even loss of<br>follow up                                                                       | Yes | Probably no<br>– industry<br>involvement<br>and sponsor           | Moderate RoB<br>due to industry<br>involvement                          |
| <b>Hauser<br/>2016<sup>46</sup></b>   | Yes | Probably yes | Yes | Yes | Uneven loss<br>of follow up<br>(35%<br>treatment,<br>30% placebo)                               | Yes | Probably no-<br>industry<br>sponsor and<br>provided<br>study drug | Moderate RoB<br>due to industry<br>involvement<br>and attrition<br>bias |
| <b>Hodis 2009<sup>47</sup></b>        | Yes | Yes          | Yes | Yes | Even loss of<br>follow up<br>(intention to<br>treat)                                            | Yes | Yes, but<br>industry<br>sponsor                                   | Low RoB                                                                 |
| <b>Joshi 2016<sup>48</sup></b>        | Yes | Not reported | Yes | Yes | Not reported                                                                                    | Yes | Probably yes                                                      | Moderate RoB<br>due to absence<br>of reporting<br>across domains        |
| <b>Nozue 2016<sup>57</sup></b>        | Yes | Not reported | No  | No  | Uneven loss<br>of follow up<br>(0%<br>treatment vs<br>15% placebo)                              | Yes | Probably yes                                                      | High RoB due<br>to performance,<br>detection and.<br>Attrition bias     |



**Table S2. Summary of GRADE findings.**

| <b>Intervention</b>                      | <b>Risk of bias</b> | <b>Consistency</b>             | <b>Imprecision</b> | <b>Indirectness</b> | <b>Publication bias<br/>(no. of studies)</b> | <b>Quality of evidence<br/>(GRADE)</b>           |
|------------------------------------------|---------------------|--------------------------------|--------------------|---------------------|----------------------------------------------|--------------------------------------------------|
| Lipid-lowering agents                    | Moderate            | All RCTs, consistent results   | None               | Non-CKD population  | 16                                           | ⊕⊕⊕○<br>Due to risk of bias                      |
| Aged garlic extract                      | Moderate            | All RCTs, consistent results   | Few participants   | Non-CKD population  | 6                                            | ⊕⊕○○<br>Due to risk of bias and imprecision      |
| Hormone replacement therapy              | Low                 | All RCTs, consistent results   | None               | Non-CKD population  | 3                                            | ⊕⊕⊕⊕<br>Minimal bias, imprecision                |
| Vitamin K                                | Moderate            | All RCTs, inconsistent results | None               | Non-CKD population  | 5                                            | ⊕⊕⊕○<br>Due to risk of bias                      |
| Lifestyle                                | Moderate            | All RCTs, inconsistent results | None               | Non-CKD population  | 4                                            | ⊕⊕○○<br>Due to risk of bias and publication bias |
| Anti-thrombosis / anti-coagulant therapy | Moderate            | All RCTs, consistent results   | Few participants   | Non-CKD population  | 4                                            | ⊕⊕○○<br>Due to risk of bias and publication bias |
| Antiresorptive                           | Low                 | All RCTs, inconsistent results | Few participants   | Non-CKD population  | 2                                            | ⊕○○○<br>Due to risk of bias,                     |

|                      |          |                                |                  |                    |   |                                                               |
|----------------------|----------|--------------------------------|------------------|--------------------|---|---------------------------------------------------------------|
|                      |          |                                |                  |                    |   | imprecision and publication bias                              |
| Antihypertensive     | Low      | All RCTs, inconsistent results | None             | Non-CKD population | 2 | ⊕⊕⊕⊕<br>Due to publication bias                               |
| Hypoglycaemic agents | Moderate | All RCTs, inconsistent results | Few participants | Non-CKD population | 2 | ⊕○○○<br>Due to risk of bias, imprecision and publication bias |
| Omega-3 fatty acids  | Moderate | All RCTs, consistent results   | Few participants | Non-CKD population | 2 | ⊕○○○<br>Due to risk of bias, imprecision and publication bias |
| Salsalate            | Moderate | Single RCT                     | Few participants | Non-CKD population | 1 | ⊕○○○<br>Due to risk of bias, imprecision and publication bias |
| Folic acid           | Low      | Single RCT                     | None             | Non-CKD population | 1 | ⊕⊕○○<br>Due to imprecision and publication bias               |
| Dalcetrapib          | Moderate | Single RCT                     | Few participants | Non-CKD population | 1 | ⊕○○○<br>Due to risk of bias, imprecision and publication bias |
